# Supplementary material for: Mice deficient in the C-terminal domain of TAR DNA-binding protein 43 develop age-dependent motor dysfunction associated with impaired Notch1−Akt signaling pathway
Source: Acta Neuropathol Commun. 2019 Jul 25;7:118. doi: 10.1186/s40478-019-0776-5 (PMC6657153; doi:10.1186/s40478-019-0776-5)
Supplement: Supplementary file 3 — Table S2. Genes downregulated (> − 1.2 fold) in 700-day-old TDP-∆C mouse spinal cord. (XLSX 41 kb) [file 40478_2019_776_MOESM3_ESM.xlsx]

## Sheet: Supplementary Table 2
Table S2 Genes downregulated (>1.2 fold) in 700-day-old TDP-∆C knock-in mouse spinal cord
q-value < 0.05, fold-change > 1.20 in moderate t-test using Storey's multiple testing correction (n = 3 for each genotypes)
ProbeName	q-value	p ( [WT] vs [dC] )	Regulation	FC (abs)	FC	Log FC	GeneSymbol	Description	Sequence
A_55_P2722568	0.0483355	0.00445385	down	3.82736	-3.82736	-1.93635		predicted gene 29218 [Source:MGI Symbol;Acc:MGI:5579924] [ENSMUST00000186953]	TTCTTTGGACCCAGGAGATGAACATATGCCTGAGAAGAAGAACTAGTGTGGAACTGTCAG
A_55_P2387104	0.00896414	0.000531578	down	3.40138	-3.40138	-1.76612	4930471M09Rik		CCAGCACTGGCTGACCCTTACAGTATTTTATATGTAAACAATAAAAATGCATGTATTCCT
A_55_P2374292	0.0312786	0.00272159	down	3.3678	-3.3678	-1.75181	9530085L11Rik	BB122408 RIKEN full-length enriched, adult male urinary bladder Mus musculus cDNA clone 9530085L11 3'. [BB122408]	GGCTCCCATGGGCACTAGACATGCAGACATAAAATACACATAAAATAGAAATAAATCTTA
A_30_P01030741	0.00843873	9.57756e-05	down	3.25488	-3.25488	-1.7026		lincRNA:chr15:102994998-102995947 reverse strand	TCTAAGAATCTTTAGCAGAGCTCCATGAGAAGGCAGATGCTGAGGGGTATAAATTGAATT
A_55_P2092354	0.0404867	0.00363283	down	3.18482	-3.18482	-1.67121	BC053393	Mus musculus cDNA sequence BC053393 (BC053393), mRNA [NM_001025435]	CTGAGCTTATAGAATGAAATACTGCTTTGAATTTACTATGAGCATCCTTCTGTAATTCCC
A_52_P505062	0.0120378	0.000839674	down	3.14674	-3.14674	-1.65386	Dstyk	dual serine/threonine and tyrosine protein kinase [Source:MGI Symbol;Acc:MGI:1925064] [ENSMUST00000188006]	TTCCTGTTTATTCAGAACTTCTCACTTTCATAGAAATTGGAGTAATGTGGCTTTACTGCC
A_30_P01021983	0.00843873	0.000439945	down	3.1443	-3.1443	-1.65274		lincRNA:chr7:100195448-100195894 reverse strand	TTTGTTCTGGAGTTTCATTTCCCAATGGCATGGGACCCATTCCACCTCTGCAATCATTAC
A_52_P96847	0.0147441	0.00111674	down	3.08131	-3.08131	-1.62355	Smlr1	Mus musculus small leucine-rich protein 1 (Smlr1), mRNA [NM_001195596]	CAATGCACCAGGCGTATCTTGAGTTTCTTTGATTGTTGACTATGCTTATTTACTTTATGG
A_55_P2105944	0.0442987	0.00402735	down	2.94814	-2.94814	-1.55981	Olfr224	Mus musculus olfactory receptor 224 (Olfr224), mRNA [NM_207695]	ATGACTGTGGTCACCCTCTTCTATGGCGCTGCTATTTATACCTACATTTTCCCTGTTTCC
A_30_P01022360	0.0301632	0.00261683	down	2.90116	-2.90116	-1.53663		lincRNA:chr3:126969590-126972626 reverse strand	TTGTTTTTCATTTTAATTCTTTTCTACTCCTCTCTTCTATCTATAATAGAGGCTTCACCT
A_51_P325664	0.00843873	0.00032184	down	2.8938	-2.8938	-1.53296	Olfr799	Mus musculus olfactory receptor 799 (Olfr799), mRNA [NM_146927]	AGCTGGTGCGGTGTTGACATTCATCATCACCTTTGTGTGTGTTGTCCTTTCTTATGGTTA
A_52_P489068	0.0163012	0.00127769	down	2.88599	-2.88599	-1.52907	Insr	insulin receptor [Source:MGI Symbol;Acc:MGI:96575] [ENSMUST00000207295]	TATGAATTCTTCAGTGTTAGTTGTGAGGTTTGAGTATCCCTGTTATTTTTGTCAGATCGT
A_55_P2743602	0.0146511	0.00110534	down	2.88511	-2.88511	-1.52863	B3glct	Mus musculus beta-3-glucosyltransferase (B3glct), mRNA [NM_001081204]	TACTGAGGCTGATTGGTAAAACCTAAAACTCAATATGAATACCCCCAACTATACAATCAC
A_55_P2733292	0.0197025	0.00163196	down	2.85881	-2.85881	-1.51541	Lpp	LPP_MOUSE (Q8BFW7) Lipoma-preferred partner homolog, partial (61%) [TC1620671]	ACTATACTCTGTACTCATCACAACTCAGGTTTTCCCTACTCCTGAGACAACACATGAATT
A_66_P139497	0.0415661	0.00374383	down	2.84913	-2.84913	-1.51052		predicted gene 9972 [Source:MGI Symbol;Acc:MGI:3642779] [ENSMUST00000069051]	ACAGCAGTTCTTTTTTCTGCCAAGTCACTGCAGGATATTCTGTTAGGGGATCTCTTATTG
A_66_P113792	0.00843873	0.000397158	down	2.84154	-2.84154	-1.50667		predicted gene 7145 [Source:MGI Symbol;Acc:MGI:3648947] [ENSMUST00000185381]	CCTTCTGAAGGAGAAAGGAAAGATGGCTTCATGTCAGGTTCTATTGACATTTATGGATGT
A_66_P117712	0.0303237	0.00263146	down	2.83682	-2.83682	-1.50428		predicted gene 4994 [Source:MGI Symbol;Acc:MGI:3645787] [ENSMUST00000118379]	CCTTAAGAAGAAGAATCAAGAGACTGACGAATTGACAAAAATCTGTGAAGAACTGATTGC
A_55_P2564262	0.0321637	0.00280828	down	2.80297	-2.80297	-1.48696	Gm33733	PREDICTED: Mus musculus predicted gene, 33733 (Gm33733), transcript variant X5, ncRNA [XR_001782813]	TGACCTGAGTTTCTTCAGAAACAAGGAATTGTTCTTGGATTATGCTTTTGCGCCCCTTTC
A_55_P1959858	0.0220362	0.00186263	down	2.79722	-2.79722	-1.48399	Cst10	Mus musculus cystatin 10 (chondrocytes) (Cst10), mRNA [NM_021405]	GACAGTTCCCTTGTTCCTTTCATCTACTTGTTTTTCAAAGGCCCACTGTTCATTATTTGC
A_52_P374961	0.00856729	0.000468046	down	2.76155	-2.76155	-1.46548	Mob3a		TGCCTATCACATGGTCGGATGATCTACTTCACTAAGTAATACTGTTGAAAGGCACTGTCT
A_52_P421815	0.00980072	0.000621253	down	2.6964	-2.6964	-1.43103	Hgf	Q7R5A9_GIALA (Q7R5A9) GLP_587_50044_49331, partial (7%) [TC1610327]	CTACTTAATATATGATTGGGTTCAAAAGTTTTACCTGTATTGCCTATTTCGGAATGCTCC
A_52_P125636	0.0139541	0.00103557	down	2.69536	-2.69536	-1.43048	Msmb	Mus musculus beta-microseminoprotein (Msmb), mRNA [NM_020597]	ATGCTGATGGTAACAAGCATTTCCTTAACACTCCCTGGAAGAAGAACTGCACGTGGTGTT
A_55_P1992413	0.00968145	0.000606722	down	2.69009	-2.69009	-1.42766	Gm3414	Mus musculus predicted gene 3414 (Gm3414), long non-coding RNA [NR_027993]	CAGAACTTTGCCTTGAGCATCAAGGTTTTAGCTTTAAAGGTTTAGATGAAATTGGTATGA
A_55_P2180849	0.0423481	0.00382491	down	2.66487	-2.66487	-1.41407	AA684185		GAGGAGGGACAACGACAGGGATAAAGACTGGACTGTCAAACACATAATTAAAGTTAATTA
A_51_P228768	0.00843873	9.59262e-05	down	2.60906	-2.60906	-1.38353	Slfn3	Mus musculus schlafen 3 (Slfn3), mRNA [NM_011409]	CCCAAAAATATTATCTGTCGGCCAAGGCAGTAAAGGACTTAGAAAAAGCTCTCGTTGAAA
A_55_P2119388	0.0463558	0.00424903	down	2.60811	-2.60811	-1.38301	Zeb2	zinc finger E-box binding homeobox 2 [Source:MGI Symbol;Acc:MGI:1344407] [ENSMUST00000202345]	CTTACTGTACCGCCGTGTGCATTCCCTCATACGGTCAGGAGTTATGACTCATTTTGAAGA
A_65_P14340	0.00843873	0.0001743	down	2.60758	-2.60758	-1.38271	Rbm47	RNA binding motif protein 47 [Source:MGI Symbol;Acc:MGI:2384294] [ENSMUST00000202794]	CCCCCTAGACAAGGGTGTTAGATTGAGCGTGGCTACAATTTATTAAGCCCTACCAGTTTA
A_30_P01032721	0.0162993	0.00127663	down	2.5917	-2.5917	-1.3739		lincRNA:chr1:175654606-175672031 forward strand	TCTGTTACTTTCAGCACCATCACTTGTTTGGGACCTTGATGGTGACCTTCTTCCCTAGAA
A_30_P01020083	0.00843873	0.000213843	down	2.53935	-2.53935	-1.34446		lincRNA:chr3:70581406-70614856 forward strand	TACAAAATGGCAAATAGAATTTCCAAGCACTTTGCTGTGCTGCAGAGAGCCCAGCCATCA
A_30_P01020670	0.0452742	0.00412866	down	2.53063	-2.53063	-1.33949		lincRNA:chr12:23420304-23420859 reverse strand	ATCAATATACCGATATATTGTTGTAGGTTGAAATGTTACATAAGGGCAGGTCACTGTACT
A_55_P1954292	0.0145	0.00108753	down	2.52966	-2.52966	-1.33894		vomeronasal 2, receptor, pseudogene 45 [Source:MGI Symbol;Acc:MGI:3757878] [ENSMUST00000174138]	TGAGACCAGAGAGAAATTCTACCCAAAAGATTAAAGAGAGAAATTCTACCCAAAAGATCA
A_65_P18983	0.0212683	0.00178833	down	2.51387	-2.51387	-1.32991	Gm3764	PREDICTED: Mus musculus predicted gene 3764 (Gm3764), transcript variant X34, misc_RNA [XR_001783905]	TTATGAACCTCCTTGCCCAATTCTGGCAGGAGATTTACATGAGATGTTACACACAAAAGG
A_55_P2729373	0.0135545	0.000994894	down	2.49046	-2.49046	-1.31642	Tenm2	teneurin transmembrane protein 2 [Source:MGI Symbol;Acc:MGI:1345184] [ENSMUST00000149787]	GAAAGGGAAGAGATGTGTGAAGCTTTGCCGACAATGAGGAAAGTAATGAATTTTTATTCC
A_51_P452898	0.00843873	0.000208397	down	2.46914	-2.46914	-1.30401	Iqgap2	Q3UQ44_MOUSE (Q3UQ44) 15 days embryo head cDNA, RIKEN full-length enriched library, clone:D930020A05 product:Ras GTPase-activating-like protein IQGAP2 homolog (Fragment), partial (74%) [TC1638380]	CATAACGACTTTAGCAGTCTTTACTGAAGTTCTTGGAATATTACCTAAGCCCCTGGAGTC
A_51_P378789	0.00918324	0.000555638	down	2.4662	-2.4662	-1.30229	Cxcl13	Mus musculus chemokine (C-X-C motif) ligand 13 (Cxcl13), mRNA [NM_018866]	GATTTATTGTCTTGCATTAAAACCAGTAACAATTGAAAGATCCTCAGCTTAAAGGTCCAG
A_55_P2734412	0.0150563	0.00114779	down	2.44679	-2.44679	-1.29089	Nlrp4f	Mus musculus NLR family, pyrin domain containing 4F (Nlrp4f), mRNA [NM_175290]	TATATTTCCACAGATTGTTCCAAGATAGGAAGAGAGCCCAGGAGGCCTTCAGTTTGGTGA
A_55_P2535521	0.0315579	0.00275029	down	2.41421	-2.41421	-1.27155	Pappa2	PREDICTED: Mus musculus pappalysin 2 (Pappa2), transcript variant X1, mRNA [XM_006496823]	ACTTGACTTTCAAGTATAGGTGAATGTGTGGCTTGCTCAGTTGAAGCATGAGACTCAATA
A_51_P144894	0.0463558	0.0042499	down	2.4088	-2.4088	-1.26831	9230104L09Rik	Mus musculus RIKEN cDNA 9230104L09 gene (9230104L09Rik), mRNA [NM_029960]	GGATACTGCCATTCATAGGAATCAGCAATTACAGGCTTAAGAAGCTGTGCAAGTGTCTGC
A_66_P128750	0.0451743	0.00411745	down	2.36814	-2.36814	-1.24375	Adarb2	Mus musculus adenosine deaminase, RNA-specific, B2 (Adarb2), transcript variant 1, mRNA [NM_052977]	GTGAGAAAACCACCGGAGCAAGATCAGTTTCTACTAAGTCTCTAAGTCACTAGGCTCCTT
A_66_P132423	0.0404002	0.00362225	down	2.36693	-2.36693	-1.24302	Nr4a3	nuclear receptor subfamily 4, group A, member 3 [Source:MGI Symbol;Acc:MGI:1352457] [ENSMUST00000154186]	ACTCGGAAAAACCAACCACCAGAAACTCCCCATGTTACCACTTTGACTTAGCCATAAAAA
A_30_P01023599	0.0186047	0.00152029	down	2.36495	-2.36495	-1.24181		lincRNA:chrX:20380294-20380946 forward strand	CCTATTGTAACTAACACATCACTCCCAAAACTGGTCACATAAAAGAGAAATTTGACCAGT
A_51_P228524	0.030482	0.00264803	down	2.35918	-2.35918	-1.23829	4933440M02Rik	Mus musculus RIKEN cDNA 4933440M02 gene (4933440M02Rik), transcript variant 1, long non-coding RNA [NR_045803]	TGCCCCATGTTTCCCTACTCTAAACTCAGACCATTGTCAAGTCAAGAGCACAGATCAGAA
A_52_P96159	0.00843873	3.962e-05	down	2.35516	-2.35516	-1.23583	Dsg2	desmoglein 2 [Source:MGI Symbol;Acc:MGI:1196466] [ENSMUST00000120102]	CAGTATGAGCTCTTAAATGTCCTATAAAGTAAGGAACAGTACATATTTCTCAAATTAAGC
A_55_P2733722	0.0236802	0.00201369	down	2.32728	-2.32728	-1.21864	Treml2	Mus musculus triggering receptor expressed on myeloid cells-like 2 (Treml2), mRNA [NM_001033405]	ACTTAGTTGAGGCCAAGTCTTGGTGCAAAGTCAAGAAGAAGAAGTGCGACCACAACTTCA
A_55_P2023161	0.0447869	0.00407901	down	2.32535	-2.32535	-1.21745	Gm13084	Mus musculus predicted gene 13084 (Gm13084), transcript variant 1, mRNA [NM_001005371]	AAATGCTCCAAGTGTGGTGGGTCCTATGTTTATGATCTGGAGACCCAATGTTGCTTTTTT
A_55_P2939612	0.0173728	0.00139016	down	2.3113	-2.3113	-1.2087	Col11a1	collagen, type XI, alpha 1 [Source:MGI Symbol;Acc:MGI:88446] [ENSMUST00000138680]	GCAGGAGATAAGGAACTATCTTACCTCTTTACAACATAAATCAGAACTGTAAGCAAAAGA
A_55_P2635625	0.00843873	6.46793e-05	down	2.30375	-2.30375	-1.20398	Col4a3	Mus musculus collagen, type IV, alpha 3 (Col4a3), mRNA [NM_007734]	TGGCTGGCTTCGCTGAACCCAGAAAGAATGTTCAGAAAACCTATTCCATCAACTGTGAAA
A_66_P115915	0.0112305	0.000763272	down	2.30279	-2.30279	-1.20338			AAAGACAACATCTCACCCTGAATTCACGCCCCAAATTTGCAAGTGAGTTCAGCACTTATT
A_30_P01033659	0.00843873	0.000121771	down	2.30048	-2.30048	-1.20193		lincRNA:chr13:104591796-104592249 reverse strand	AGGTTGTGGATGCTGGAACATTTCCTTCTGTGGTGTCTTTATAGGCATCGTGGTCTAACT
A_55_P2713405	0.0364228	0.00322757	down	2.29346	-2.29346	-1.19752	Thop1	thimet oligopeptidase 1 [Source:MGI Symbol;Acc:MGI:1354165] [ENSMUST00000167658]	CAGGCCTCACCTAGGGTATAGAAAGACCTTGTTCTAAAACAGAAAAGAAGAAGAAGAAGA
A_52_P572368	0.0496009	0.00458774	down	2.28406	-2.28406	-1.1916	Ctcflos	Mus musculus CCCTC-binding factor (zinc finger protein)-like, opposite strand (Ctcflos), long non-coding RNA [NR_040321]	TCCATTGCTGATGTACTCCCACATACCTTTGATATTCTCTAGAACCTCCTATCAGGTCTG
A_51_P349152	0.0265035	0.00226978	down	2.28215	-2.28215	-1.19039	Gm13288	Mus musculus predicted gene 13288 (Gm13288), mRNA [NM_001243167]	TGGCTGACCGTGTGATTACATAAAATCTTCCCATTTGACCACTTTTATTTTTGTCGTTGC
A_52_P599736	0.0290701	0.00251255	down	2.27239	-2.27239	-1.18421	Arhgef10l	Mus musculus Rho guanine nucleotide exchange factor (GEF) 10-like (Arhgef10l), transcript variant 1, mRNA [NM_172415]	AAGTCTCCTTTCTGCATAGGAAAGATGTCCTCGGTGACTCAGAAGAAGAAGATATGGGGC
A_55_P2745275	0.00905707	0.000542979	down	2.26775	-2.26775	-1.18126	Olr1	Mus musculus oxidized low density lipoprotein (lectin-like) receptor 1 (Olr1), transcript variant 1, mRNA [NM_138648]	GCTGAAAACTGCATTCTAATTGCATTCAGCATATGTCAGAAGAAGACAAATCATTTGCAA
A_52_P715204	0.0122873	0.000864499	down	2.22947	-2.22947	-1.1567	Gm9990	PREDICTED: Mus musculus predicted gene 9990 (Gm9990), misc_RNA [XR_140856]	TACAACAATGCCTAGAAAGTAGCACAATAGCTGTTATCGGCAAGGTTAGTGCTGACTTCA
A_66_P127103	0.00843873	7.48645e-05	down	2.22453	-2.22453	-1.1535		PREDICTED: Mus musculus predicted gene 2568 (Gm2568), misc_RNA [XR_106698]	AGGGAAGTGGAAGGTTTGGTGGTCATCCAGTTCATCTCACTTCAAATGTTTGTGGAAGAA
A_52_P963982	0.0463162	0.00424412	down	2.21948	-2.21948	-1.15022	Scn9a	Q4H9T0_9DEIO (Q4H9T0) Biopolymer transport protein ExbD/TolR, partial (9%) [TC1616489]	CCAGTGAAAAACGTATTTGAAATGTTTCATTTAATCCCATAAGTGATACCTCTCATGGAC
A_51_P274803	0.0151971	0.00116347	down	2.19509	-2.19509	-1.13428	Trim30b	Mus musculus tripartite motif-containing 30B (Trim30b), mRNA [NM_175648]	TGGCCATGCTTTGGTTGAAGAATGAGAATACCTGGAGTATAAACTCACAAGTGTTTTTAC
A_30_P01017564	0.0367444	0.00325948	down	2.19296	-2.19296	-1.13288		lincRNA:chr3:58118325-58136550 forward strand	AAGAAGAAGTTTCACCTGGCCCTTACCCTTGGGCTTCTTTTACTGGTTTCCTTGTGTTTG
A_66_P134717	0.0370987	0.00329694	down	2.1918	-2.1918	-1.13212	Duox2	dual oxidase 2 [Source:MGI Symbol;Acc:MGI:3036280] [ENSMUST00000053734]	TTTGCGATGTATAGCAAGGAGAGGAAAGCCCCTATTTCTGACAACTGTGGATGGGAACAG
A_66_P135302	0.0427868	0.0038745	down	2.18071	-2.18071	-1.1248	Spata6		GCAGAAACTACTAAGAGTTATCCTTTGAATTCCATCACATTTGTACTCATACACACATGT
A_55_P2014565	0.0479006	0.0044071	down	2.18053	-2.18053	-1.12468	Ces5a	Mus musculus carboxylesterase 5A (Ces5a), mRNA [NM_001003951]	AAGCATTCTCCGACCGACATCCGAGACACTTTACTGGACTTGTTTGGAGATGTGTTCTTT
A_55_P2740349	0.0168122	0.00133295	down	2.16613	-2.16613	-1.11512	Serpinh1		AAACAAAAGTTCATGACTGTGATGCCCAACATAACAATTCTAGGGCAGGCATGCCAGGGA
A_30_P01028206	0.0400134	0.0035792	down	2.15961	-2.15961	-1.11077		lincRNA:chr13:104802772-104802960 reverse strand	ACTGATACAACTAAGAAACAACATTGGCCAGAAAGGGCCACTGCAGGCTCAAGTTTTTAA
A_51_P142594	0.0281993	0.00242745	down	2.15056	-2.15056	-1.10471	Rnf207	Mus musculus ring finger protein 207 (Rnf207), mRNA [NM_001033489]	CAGAAGTGTACGCTGCATTCGGAGCCGTACATCATGTTTTCCACCGACAAGAAGTCGCTG
A_55_P1970901	0.00843873	3.26828e-05	down	2.14854	-2.14854	-1.10335	Gramd2	Mus musculus GRAM domain containing 2 (Gramd2), mRNA [NM_001033498]	TCAGTGAGTGACCTGAAGTACCTGTTTACAGATTAACTGGCTCCTACAACTTTTGGACTC
A_30_P01019118	0.00843873	0.000368214	down	2.14362	-2.14362	-1.10005		lincRNA:chr8:12535648-12544923 reverse strand	GGATGGCCTGGACTTCTTAAAGAAGCCATGAAATTCTTTTAGATATCTTTTGTTTCTTGA
A_55_P2722296	0.0374839	0.00333379	down	2.12788	-2.12788	-1.08942	Casc3	cancer susceptibility candidate 3 [Source:MGI Symbol;Acc:MGI:2179723] [ENSMUST00000144220]	TGAAGATTTATCTTGCCCCATATTCCTACCCAACCATCTGTGTTGATTCTTCAGTCGTCC
A_55_P2142376	0.00843873	0.000306601	down	2.12772	-2.12772	-1.08931		predicted gene 10770 [Source:MGI Symbol;Acc:MGI:3642046] [ENSMUST00000099418]	ACCTTGTGAATGTAACCAATGTAGTAAAGCCTTTACACAAAGTAGTAGTCTTCTAACACA
A_51_P144543	0.0322283	0.00281545	down	2.11763	-2.11763	-1.08245	1700063H04Rik	PREDICTED: Mus musculus RIKEN cDNA 1700063H04 gene (1700063H04Rik), misc_RNA [XR_140778]	CTCCTGGCTTCTTGACTTTGGCATCTAGTAAAGTTTTCAAGTGCATGTCCTGACCATAGA
A_51_P319114	0.0121754	0.000853798	down	2.11401	-2.11401	-1.07998	Olfr610	Mus musculus olfactory receptor 610 (Olfr610), mRNA [NM_147081]	TGGACAGCAATACCCATCTGCTTAATTTACGTTCTTTCTGTGCTGGGCAACATAACCATA
A_66_P134962	0.0298984	0.00259177	down	2.10469	-2.10469	-1.07361	LOC102635658	PREDICTED: Mus musculus uncharacterized LOC102635658 (LOC102635658), ncRNA [XR_387696]	AGGGCCCTGGGATTTTTATTTTTATTCGTTTTCCATTACAACTGCACAGCAACGCAAACA
A_55_P2509498	0.0237557	0.00202066	down	2.10302	-2.10302	-1.07246	Gm16712	Mus musculus predicted gene, 16712 (Gm16712), long non-coding RNA [NR_108021]	AAGGATTGGTAGGGAGGAACAGCTTTATTGCTGTTGAGCAGATCCTTAGGATTGGAGTTG
A_52_P144138	0.0188796	0.00154922	down	2.10024	-2.10024	-1.07055	BC049715	cDNA sequence BC049715 [Source:MGI Symbol;Acc:MGI:3605234] [ENSMUST00000203499]	AAAGCAGCTTGAGTTCTCGAATTTTTCATGGTACCGTGTACATTTCATTGATGCTGTATA
A_30_P01028233	0.0219502	0.00185383	down	2.09744	-2.09744	-1.06863		lincRNA:chr14:65785477-65815798 forward strand	ATGCAGCATATGGCCATAGGACTCTCTGAGAGACTGAGCATCTAATTTCTGAGAACCAGT
A_30_P01028494	0.0254858	0.00217714	down	2.09448	-2.09448	-1.06659		lincRNA:chr3:26975624-26988699 forward strand	TTTCTGGCTCAGGTTACGGTGAGCGCGGCTGCCAATGTCAGCATACAAAATGGCATGGCG
A_52_P532323	0.0235363	0.00199981	down	2.0942	-2.0942	-1.0664	Marveld2	Mus musculus MARVEL (membrane-associating) domain containing 2 (Marveld2), transcript variant 1, mRNA [NM_001038602]	AAAGGAGCGTTGCGATTACCTCAAGAACAAACTCTCTCACATAAAGCAAAGAATTCAAGA
A_55_P2840455	0.0172559	0.0013764	down	2.08622	-2.08622	-1.06089	Gm35358	PREDICTED: Mus musculus predicted gene, 35358 (Gm35358), ncRNA [XR_387890]	TAAACAAGAGAAGAAGAAGAAATCCCAAGCTGAGGATGAGGAGGTGACAAGCCTATCTCC
A_55_P2639288	0.00843873	7.61846e-05	down	2.08012	-2.08012	-1.05666	Cpne3	copine III [Source:MGI Symbol;Acc:MGI:1917818] [ENSMUST00000134025]	ACTTACTGCACATGTACTCTGTAGTTCACTAAAGGATTATGCCCTGAGAAACCCATCATG
A_52_P956133	0.00843873	9.69384e-05	down	2.07499	-2.07499	-1.05311		Q8K0H2_MOUSE (Q8K0H2) Chpt1 protein, partial (18%) [TC1615307]	TGCCTCTTACGACGCTGTTGTAAATTGTTGGTTACTTAAGTCATTTTTAGTTTAAGTCTG
A_66_P137240	0.0422843	0.00381671	down	2.05302	-2.05302	-1.03775			CTTTATGATGTTTATCAGTACACAGGGCATTTCCAAAGGGATGGAAAACAAGTTACTGGG
A_55_P2065506	0.0332772	0.00292022	down	2.04688	-2.04688	-1.03343		immunoglobulin heavy variable 1-36 [Source:MGI Symbol;Acc:MGI:4439639] [ENSMUST00000103513]	TATCCTGTAAGGCTTCTGGATTCACATTCACTGACTACTACATGCACTGGGTGAAGCAGA
A_55_P2719085	0.00843873	1.17847e-05	down	2.04582	-2.04582	-1.03268	Unc5c	unc-5 netrin receptor C [Source:MGI Symbol;Acc:MGI:1095412] [ENSMUST00000155416]	CATTTGTTGGTCGGTTACTCGGTTTCAGTAATGGGACAGCCAAACCTTTTAAATTAAAAC
A_52_P518613	0.0363514	0.0032204	down	2.02959	-2.02959	-1.02119	Adam23	a disintegrin and metallopeptidase domain 23 [Source:MGI Symbol;Acc:MGI:1345162] [ENSMUST00000146403]	ATAGTTCTCTAAGCTTTCACATTTTAAGAAAGTGTAAATGGGGTAATTTCCAGTGCATCC
A_66_P130560	0.011165	0.000757454	down	2.00968	-2.00968	-1.00697			TAATTGTTGCTGTTAACAACATGGATTCCACCGATCTACCATACATTCAGAAGAGATATG
A_66_P121948	0.0177021	0.00142803	down	2.00457	-2.00457	-1.00329	1700030M09Rik	Mus musculus RIKEN cDNA 1700030M09 gene (1700030M09Rik), long non-coding RNA [NR_045903]	GGCTGGAAAGGAAAGGGAAAGTCTGGCGAAACCACCTGATATTTGCTTTAAAGTATTTCA
A_55_P2171897	0.048134	0.00443416	down	2.0024	-2.0024	-1.00173	Notch1	Mus musculus notch 1 (Notch1), mRNA [NM_008714]	TCCTGCAGTGGAGGGGGCCTTGAGACAGGCAACAGTGAAGAAGAAGAAGATGCACCTGCT
A_51_P290931	0.0339612	0.00298656	down	1.97678	-1.97678	-0.983153	Ptprb	protein tyrosine phosphatase, receptor type, B [Source:MGI Symbol;Acc:MGI:97809] [ENSMUST00000217925]	TCTGTACTCCCTAAAGGTGAGCTATTATAAGGCTAACAAAGTTGCAAACATTTAACTTTG
A_66_P122698	0.00843873	0.000334407	down	1.97274	-1.97274	-0.980202	4930540I17Rik	BY715588 RIKEN full-length enriched, adult male testis Mus musculus cDNA clone 4930540I17 5'. [BY715588]	AGGTGAAGAGGTCCGTGTTTTTATGTTATACTGTCTGTTCTGCTGGATACATTAACAAAA
A_51_P205779	0.027727	0.00238294	down	1.97079	-1.97079	-0.978772	Cd5l	Mus musculus CD5 antigen-like (Cd5l), mRNA [NM_009690]	ATGGTAGAGACTTGAGGAGTTGGGACCTCGTTAGAAGAAGAAGGTCGTTGGAGTGTGCCT
A_55_P2860613	0.0407323	0.00366149	down	1.96841	-1.96841	-0.977031		BB555982 RIKEN full-length enriched, 2 days pregnant adult female ovary Mus musculus cDNA clone E330021P13 3'. [BB555982]	GTATCAAGCAATGATGGCTGACTTAAAGACTTCCTGAGGGCCAAACTCTATTATTGTTTA
A_52_P284652	0.0230501	0.00195475	down	1.95862	-1.95862	-0.969835	Wrb	tryptophan rich basic protein [Source:MGI Symbol;Acc:MGI:2136882] [ENSMUST00000140476]	AAAGGTTATTCATGTCATTGAAGAATGAGTAGACATGTAGGAATATTTTTTCGGGTTGGG
A_30_P01018095	0.00843873	0.00030467	down	1.95638	-1.95638	-0.968187		lincRNA:chrX:11699327-11699881 reverse strand	TCAGGTTTCCAAGATTCTGCTTCCTTTCACACAAAAGCTGGGAGAAAGTCTTTGTTGGGG
A_55_P2263234	0.0475817	0.00437335	down	1.94641	-1.94641	-0.960813	C80406	H3047A11-5 NIA Mouse 15K cDNA Clone Set Mus musculus cDNA clone H3047A11 5'. [BG079965]	TGTCTCTTTATCCAATCCCAAACTACCTGTTCTGTGGCGATACCATCCACAGTGAGATGT
A_55_P2716612	0.0339653	0.00298771	down	1.9453	-1.9453	-0.959991	D430041D05Rik	RIKEN cDNA D430041D05 gene [Source:MGI Symbol;Acc:MGI:2181743] [ENSMUST00000155458]	TTGTTTGTCCTGGTCATTTGCTGTCTCACTTCAGTCCACACAGAAATGTGACACAGGAAT
A_30_P01026023	0.00843873	7.5419e-05	down	1.93817	-1.93817	-0.954694		lincRNA:chr7:3309825-3331151 reverse strand	GTGTGGCTTTCACGGTCTTTGTCTTCTGTTTTGTCAGGTTCCGAGGGTCCGGGATCAGCT
A_30_P01024730	0.0159187	0.00123942	down	1.93136	-1.93136	-0.949613		lincRNA:chr3:37547973-37548436 reverse strand	TAGCACCTCAAACTCTCCTGGTCCATGTGAGCTGAGGCTCTGCTCTTCCAGAGCATCTGG
A_55_P2147260	0.00843873	0.000182921	down	1.92965	-1.92965	-0.948338	Sh2d4b	Mus musculus SH2 domain containing 4B (Sh2d4b), mRNA [NM_177816]	CTACAGGAACCCTGTGGACAGAGGGATAGCCCACCAGACTATCACCTGTTGTTTGAATGA
A_55_P2129407	0.013503	0.000990487	down	1.92794	-1.92794	-0.947056		RIKEN cDNA 4932431P20 gene [Source:MGI Symbol;Acc:MGI:2149781] [ENSMUST00000141713]	AGAAAGTTCACAAAGTCCGCAAGCCCAGGAAGAAGAAGAAGAAAGAAACCGAAGCCATAG
A_55_P2099677	0.0429112	0.00388725	down	1.9274	-1.9274	-0.946657	Lrp2	low density lipoprotein receptor-related protein 2 [Source:MGI Symbol;Acc:MGI:95794] [ENSMUST00000100051]	CCTCTGTGACTTTATATCCCTGTAGGAGTAACTATAAATTCCAATAAATGATGACTGCAT
A_55_P2743537	0.0322951	0.00282279	down	1.92731	-1.92731	-0.946591	Itga10	Mus musculus integrin, alpha 10 (Itga10), mRNA [NM_001302471]	TTCTTTACCCGTAAGAAAATCCCCAAAGAAGAAGAAAGTGAGGAGAAGTTGGAGCAGTGA
A_55_P2049811	0.0426307	0.00385491	down	1.92309	-1.92309	-0.943429	Lmo3	LIM domain only 3 [Source:MGI Symbol;Acc:MGI:102810] [ENSMUST00000163065]	GAAGCTGCAGCGACTCAGGCACGCCTCAGTCAACTCATGCAGAAACAAGAGAAAAGTTTT
A_55_P2771829	0.0465912	0.00427365	down	1.90808	-1.90808	-0.932122	Gm36447	PREDICTED: Mus musculus predicted gene, 36447 (Gm36447), ncRNA [XR_377280]	AGACAAATGAGTCATTATGGATTCGTTCCCCAGGCCATTTCTCCTTCTTCATGAAGTGTG
A_55_P2043782	0.0439253	0.0039883	down	1.89934	-1.89934	-0.925501	Trpm1	Mus musculus transient receptor potential cation channel, subfamily M, member 1 (Trpm1), transcript variant 2, mRNA [NM_001039104]	TGAACCCCCAGCCAAAGGCAAGAAGAAAAAGAAGAAGAAGAAAGAGGAAGAGATTGACAT
A_55_P2722925	0.0257569	0.00220165	down	1.89825	-1.89825	-0.924673		NLR family, pyrin domain containing 5, pseudogene [Source:MGI Symbol;Acc:MGI:5010941] [ENSMUST00000190796]	CTCCATATACATTTTTAAGTGTACAGACTGCCAGTTACACCAGGAAGATTTTTAGAAGAA
A_55_P2418021	0.00843873	0.000222825	down	1.8971	-1.8971	-0.923798			CTCCTTTTCTAAGACATAAAAATGAGTACGGTATTGTCCTTCCCCTTTAAGAGCTTATAC
A_55_P2157730	0.0161045	0.001258	down	1.89603	-1.89603	-0.922981	Gpr158	G protein-coupled receptor 158 [Source:MGI Symbol;Acc:MGI:2441697] [ENSMUST00000155760]	GGGAACCAATGATGCCAGAGAAAAGTTGATACTTCCAACAACTGCAGTTTTTAAACTTGT
A_30_P01028249	0.0344868	0.00303759	down	1.89466	-1.89466	-0.921942		lincRNA:chr15:59130091-59131239 reverse strand	AGTGTGTCCCTCTTCATCTTGACTATACATTCCTCAGGGATTTGCTAATTTAGCTTTTTT
A_52_P347401	0.0425502	0.00384664	down	1.87784	-1.87784	-0.909072	Ccdc155	Mus musculus coiled-coil domain containing 155 (Ccdc155), mRNA [NM_201374]	AAACTTGCCCCAGGAAGCTCTCGTGAGAGTTGCCACATTGTACCAGAGATGCACCAAGCC
A_52_P547730	0.00843873	0.000167241	down	1.86455	-1.86455	-0.898828	Aven	apoptosis, caspase activation inhibitor [Source:MGI Symbol;Acc:MGI:1921518] [ENSMUST00000003705]	CCCCACTTAATGAGAAATGATTGATAAATGCTCACGATGCTAGGGAATGAATGATATTTA
A_55_P2021393	0.0440231	0.0039982	down	1.8607	-1.8607	-0.895842	Vmn2r65	Mus musculus vomeronasal 2, receptor 65 (Vmn2r65), mRNA [NM_001105180]	TTCATTCAGAAAGGAAAGGCTGTCTGCTGTTTTGATTGTACCCCATGTCCAGAGAATGAA
A_55_P1994873	0.0110073	0.000738901	down	1.85142	-1.85142	-0.88863	Vmn2r20	Mus musculus vomeronasal 2, receptor 20 (Vmn2r20), mRNA [NM_001104634]	GTGGAGATTCTTTCAATTCTGGCCTCCAGTTCTATCTTACTACTCTGTATATTCCTTCCC
A_51_P471177	0.0415863	0.00374856	down	1.84693	-1.84693	-0.885126	Stra6	Mus musculus stimulated by retinoic acid gene 6 (Stra6), transcript variant 2, mRNA [NM_009291]	CAGCCTCAGGCCGGCAGAAGAAGAAGAAGGGATGCAGTTGCTACAGACCAAGGACCTGAT
A_55_P2005135	0.00843873	3.66486e-05	down	1.83872	-1.83872	-0.878705	Tardbp	Mus musculus TAR DNA binding protein (Tardbp), transcript variant 4, mRNA [NM_001008546]	ACCTAAGCATAATAGCAATAGACAGTTAGAAAGAAGTGGAAGATTTGGTGGTAATCCAGG
A_52_P1100120	0.0281592	0.00242335	down	1.83536	-1.83536	-0.876061			TCACTGTTTCAGGTTATCTATCCACTTAAGTCAACATTCTTTACAAATAGGTTACTTGGG
A_65_P17641	0.00843873	0.000333334	down	1.82455	-1.82455	-0.867544	Dock8	AB191037 dedicator of cytokinesis 8 {Homo sapiens} (exp=-1; wgp=0; cg=0), partial (4%) [TC1703985]	GATAAATGAGAGACTTCAGAACAAGTTATTTTCAGACTCCAAAATGTTATCATCAGAGGC
A_52_P73986	0.0359707	0.00318416	down	1.81938	-1.81938	-0.863449	Mtnr1a	Mus musculus melatonin receptor 1A (Mtnr1a), mRNA [NM_008639]	ACAGCCAAGATGTTCTTTGTGGAGAGTTCAAATGAAGAAGCAGATAAGATTAAATGTAAG
A_51_P475689	0.0313406	0.00272844	down	1.81938	-1.81938	-0.863449	Cd209b	Mus musculus CD209b antigen (Cd209b), transcript variant 1, mRNA [NM_026972]	CAGGATCGTGAAAAAGGCTCTGGGATTCTTCTTTTTATCAGATTTTTCATCCTCTGCATT
A_55_P2522975	0.0497625	0.00460499	down	1.81776	-1.81776	-0.862163			GAGGGCATGCTTACTTTGTAGAATCTGAAGTGATTGAGAGATGTTTTCACAGTAAAGTAC
A_55_P2827736	0.0215986	0.00182163	down	1.81681	-1.81681	-0.861405		AGENCOURT_10254631 NIH_MGC_143 Mus musculus cDNA clone IMAGE:6582264 5', mRNA sequence [BU554916]	CCAACAATTTCTAAATTGACTGGTAAACTCAGCACACGGAAGAAGAAGAAGAAGAAGAAG
A_66_P124593	0.0458542	0.00419007	down	1.80393	-1.80393	-0.851146	4930586N03Rik	Mus musculus RIKEN cDNA 4930586N03 gene (4930586N03Rik), long non-coding RNA [NR_131052]	CCGACTGAGACCAGTCCCCTGCAACTTGGAACTAAAGGTAAGCTAATCTGTGTTTCCTGG
A_52_P300776	0.00843873	0.000124587	down	1.79619	-1.79619	-0.844943	Aplf	aprataxin and PNKP like factor [Source:MGI Symbol;Acc:MGI:1919353] [ENSMUST00000203776]	TGCTTCCTAGACAAGCGGATAAACTATTTTAATGGTCTTAAGAGTATATTCTGGTCTTCC
A_55_P2180181	0.0495485	0.00458102	down	1.78938	-1.78938	-0.839458	0610006L08Rik	Q9LN52_ARATH (Q9LN52) F18O14.18, partial (8%) [TC1718240]	CAATTGATTCTGATCACTCTCCCCATGATACAGTTTATTTCTTCATCTTGACCTTCTCAG
A_66_P129775	0.0197249	0.00163474	down	1.78419	-1.78419	-0.835265	Podnl1	podocan-like 1 [Source:MGI Symbol;Acc:MGI:2685352] [ENSMUST00000147175]	AAACAAAAACAAATAGTATGGCTCGGTCAATCTCTATGGAAGAAATTTGGTGACCACCAT
A_55_P2060323	0.0423481	0.00382542	down	1.78205	-1.78205	-0.833541	3110062M04Rik	RIKEN cDNA 3110062M04 gene [Source:MGI Symbol;Acc:MGI:1925662] [ENSMUST00000118559]	TTGACTTACTAGAATCTACTGACTTGGTTCCTCCTTGTAGGCATTGAAGATCGGCACCCA
A_55_P2578146	0.0427868	0.00387499	down	1.77363	-1.77363	-0.826701	LOC102637814	PREDICTED: Mus musculus uncharacterized LOC102637814 (LOC102637814), ncRNA [XR_388589]	AATGATGTCAAAATCAATAGCAAAGCTCAGTGCCACTATGCAATTTCTCAGATTCACTGC
A_55_P2034875	0.0386623	0.00344937	down	1.76619	-1.76619	-0.820641	Siglecg	Mus musculus sialic acid binding Ig-like lectin G (Siglecg), mRNA [NM_172900]	ATGAAGGAGAATTCACCTGTGCTGCACAGAACCCACTGGGTGCCCAGCGCATCTCTCTGA
A_55_P2731756	0.0113535	0.000774269	down	1.76009	-1.76009	-0.815648	Gm20319	PREDICTED: Mus musculus predicted gene, 20319, transcript variant 2 (Gm20319), misc_RNA [XR_141296]	CACATTCACTACAGTAAATGTTATCCCAAAGCATACATCCTGACTCCAAAGTAATTTTGT
A_55_P2730357	0.00843873	0.000383653	down	1.75984	-1.75984	-0.815448	Fam13c	family with sequence similarity 13, member C [Source:MGI Symbol;Acc:MGI:1918971] [ENSMUST00000218542]	ACATCCCAGGGAGTGTAAATCTAAAACGTGCGTTAAACTTAACAACACTAAACAAAACTT
A_30_P01028498	0.0415661	0.00374416	down	1.74497	-1.74497	-0.803204		lincRNA:chr2:112014068-112049540 forward strand	TTGAATTTCACATTCTTAGCAGAACAGTTGCCTGAGCACACACATTATAGGACATCCATT
A_55_P2737289	0.0254682	0.00217461	down	1.73997	-1.73997	-0.79906	Mbd4	methyl-CpG binding domain protein 4 [Source:MGI Symbol;Acc:MGI:1333850] [ENSMUST00000147282]	TAACTGATCTTTGAGCTTGGTCATCAGGCCCTTAATTATGGCAGAGAGGTAATCAGCTGG
A_66_P117348	0.0128228	0.000918849	down	1.72426	-1.72426	-0.785973		olfactory receptor 396, pseudogene 1 [Source:MGI Symbol;Acc:MGI:3030230] [ENSMUST00000205791]	TTGCTGACCATGTCCCATTCCATGCTGCACACTTTGCTCTTAACTAGGTTGTCTTTCTGT
A_66_P125639	0.0215568	0.0018166	down	1.71131	-1.71131	-0.775103	Bptf	Mus musculus bromodomain PHD finger transcription factor (Bptf), mRNA [NM_176850]	GGAGGAAGAGAAGGACTCTAAGTCCAAGAAGAAGAAGATGATCTCTACCACCTCTAAGGA
A_55_P2395371	0.0193959	0.00160206	down	1.69939	-1.69939	-0.76502	1700015C15Rik	BY706114 RIKEN full-length enriched, adult male testis Mus musculus cDNA clone 1700015C15 5'. [BY706114]	CACCAGATGTACACATGGTTACATATACATATGTTCAGGTAAAGCAATTATACGCATAGA
A_55_P2737627	0.0272755	0.00234166	down	1.68742	-1.68742	-0.754823	Zyg11b		TGCAGTAAATAGAGCATGCGTACACTGCACATCATACACAAACACACACTACTAGCAAGT
A_30_P01019700	0.0259012	0.00221459	down	1.68593	-1.68593	-0.753541		lincRNA:chr18:3003075-3016150 forward strand	TTGTCTTTCATCTTGGTGAGGTCAATGTGCAACCGAGTGACAGGACAAGGAAGTAGACAT
A_66_P137767	0.0496128	0.00458999	down	1.67561	-1.67561	-0.744689	3830432H09Rik	Mus musculus RIKEN cDNA 3830432H09 gene (3830432H09Rik), long non-coding RNA [NR_126486]	AGAGGGGAACATTAGGCGGCTTCCTTTATTGTTCTCCACCTTTATAAAGAAAACTAGCTC
A_55_P2718890	0.0166364	0.00131539	down	1.67013	-1.67013	-0.739964	Top1	topoisomerase (DNA) I [Source:MGI Symbol;Acc:MGI:98788] [ENSMUST00000164694]	ACAATTCTGACAATTTAGTAATCCTTAACTAGCTGCTTTGTTCTCTCTTTAGTCCGCCAC
A_30_P01028043	0.0135001	0.000989651	down	1.66655	-1.66655	-0.736866		lincRNA:chr4:3009566-3009932 reverse strand	CTCAACTCTGTTGTCACAGTGCTCCACAGTGGTGTCAGTGTGTTCCACTGTGATGTCACA
A_30_P01024278	0.0104611	0.00068401	down	1.66196	-1.66196	-0.732886		lincRNA:chr12:32781477-32808567 reverse strand	TTTTAGGGGAATAAGGGATTACAGGAGCGAGTGCTTCCTCTATTAGTTCGTGCAAAGTGA
A_66_P126529	0.021354	0.00179654	down	1.66131	-1.66131	-0.732318		BB075745 RIKEN full-length enriched, adult male diencephalon Mus musculus cDNA clone 9330112G02 3'. [BB075745]	CTGTCTACCAGAAGAACACAGCTTTTTCCTTTGCCCAGGATTGGGGCTATAAATCAGTGG
A_55_P2720482	0.0148482	0.0011271	down	1.65578	-1.65578	-0.727512	Lsg1	large 60S subunit nuclear export GTPase 1 [Source:MGI Symbol;Acc:MGI:107236] [ENSMUST00000124858]	TGTCTTAGGTACCATGGCAGTGTACAAGTGAGTTCAAGAGAATTCCTTGACAAGTTTACG
A_66_P133508	0.0389399	0.00347504	down	1.65559	-1.65559	-0.727344	Supt7l	suppressor of Ty 7-like [Source:MGI Symbol;Acc:MGI:1919445] [ENSMUST00000202421]	TGATGTCAGCATCACGTGTGAACATAGTCTTCAAAATGCAAAAGAGGCCTAGAGAGATTC
A_30_P01024802	0.0390907	0.00349122	down	1.65076	-1.65076	-0.723134		lincRNA:chr15:60656586-60685333 reverse strand	TATCTCTAGGTTTTTCCTCCTCAACAGAAACCGAGCTCAAAGAGAAGAGAGAAGAAAAAA
A_52_P92213	0.0451442	0.00411366	down	1.64557	-1.64557	-0.718586	Ermard	UI-M-BH3-axd-h-05-0-UI.s1 NIH_BMAP_M_S4 Mus musculus cDNA clone UI-M-BH3-axd-h-05-0-UI 3'. [BE947738]	TGTTGATGGTAATAGGCAAGAAGAAGAAGCTCATGCAAGGTTTCAGCTATAGCTCTGGGG
A_52_P388164	0.00843873	7.55455e-05	down	1.64107	-1.64107	-0.714637	Olfr608	Mus musculus olfactory receptor 608 (Olfr608), mRNA [NM_146756]	TTGGTATTCCTGGCTTCGAAAATTTTTACTACTTGATCAGCATCCCTGTTTGCCTCCTGT
A_52_P1179890	0.00864442	0.000479957	down	1.63288	-1.63288	-0.707418		predicted gene 3854 [Source:MGI Symbol;Acc:MGI:3782026] [ENSMUST00000208865]	CTTTGGTCCAAAATATGAGGATGTTTAGTCATTCTTTTCACTTAGGAGATTGTTTAGTCC
A_65_P17869	0.0205127	0.00171431	down	1.62858	-1.62858	-0.703618	Rpf1	Mus musculus ribosome production factor 1 homolog (Rpf1), transcript variant 1, mRNA [NM_027332]	GGTTTTAGCAATTAGGTTGTCGTCATTTTAAAATTGTCAATTCCACTGTAAGAAGCAAGC
A_55_P2041629	0.0339612	0.00298579	down	1.61382	-1.61382	-0.690476	4930503E14Rik	Mus musculus RIKEN cDNA 4930503E14 gene (4930503E14Rik), mRNA [NM_029131]	GAGAGGGTAGAACTTTTTCAAATCTTGGACATTGAAATGAATACTGATTTGAACTACAGG
A_55_P2732201	0.0477394	0.00439116	down	1.60715	-1.60715	-0.684504	Rictor		CCATGGCATGTCTGCACCTGTACACCAATACCACACATTTACATATATAGTAAATTAATA
A_55_P2592137	0.0230239	0.001952	down	1.60691	-1.60691	-0.684293	Dio1	Mus musculus deiodinase, iodothyronine, type I (Dio1), mRNA [NM_007860]	CAGTACAGATGTCTTTTACCTTTGACCTGTGTTCCCAGATGAAGTACTAGCTCAGATTTT
A_66_P102765	0.019535	0.00161582	down	1.60118	-1.60118	-0.679136	Col4a4	Mus musculus collagen, type IV, alpha 4 (Col4a4), mRNA [NM_007735]	CCCACTGAGAGAGACACTCATGTCAGAGCTCACTTTTCAGTGCACTTTAGAATAATTGAA
A_55_P1981246	0.0412697	0.00371555	down	1.58447	-1.58447	-0.664			TGCCTCAATCCTAATTCACTTTACTTTCGCCAAATTAAAACTGCTGGGTGCCATCCCTGG
A_55_P2086525	0.00843873	0.000280421	down	1.58107	-1.58107	-0.660901	Nlrp1c-ps	PREDICTED: Mus musculus NLR family, pyrin domain containing 1C, pseudogene (Nlrp1c-ps), transcript variant X1, misc_RNA [XR_390242]	TTTTGTACTATCCTGAAGAACAGTGTGATCTCACAAGCAGGAGACCTCAGATCTGCACTG
A_55_P2740720	0.0110681	0.000744592	down	1.57848	-1.57848	-0.658538	Tnfrsf19		ATTTATTTTTGCTTCCAGACACCAAGACTGCTCAGTCTGTAGGCCTCATCACAGGCTTGT
A_55_P2734912	0.0310828	0.00270239	down	1.574	-1.574	-0.65444	Zdhhc20		AATTCATTTTCCTGGTTCTAGCCTGCCTAGATGGCTAGATGGCTAGATGGTAGCTCACAA
A_52_P915787	0.0215037	0.00181113	down	1.56697	-1.56697	-0.647981	Gm46421	PREDICTED: Mus musculus uncharacterized LOC108168091 (LOC108168091), ncRNA [XR_001780980]	TACTGTAGTTACACTAGTTCTTCCAAGAATAATATCTAGGTAATGATTGTGTTCCTACCG
A_52_P354965	0.042345	0.00382318	down	1.56545	-1.56545	-0.646576	Ric3	Mus musculus RIC3 acetylcholine receptor chaperone (Ric3), transcript variant 2, mRNA [NM_178780]	ACGGTGATAATCACACTATAGTGTCAGAATAGGGCAATTTCATCACCCTAGGAAGTCTTA
A_51_P273005	0.0380948	0.00339432	down	1.561	-1.561	-0.642474	Actl7a	Mus musculus actin-like 7a (Actl7a), mRNA [NM_009611]	ACATGGGCCTTTCTTCCTCTACAGAAGGTGCTTCTGAGCAGACACAGCATGCTCACCGTG
A_30_P01023629	0.0298949	0.00259008	down	1.55794	-1.55794	-0.63964		lincRNA:chr1:52507332-52514490 forward strand	TTCCCACTCTGAGTCTGTGGTGAAGTCTGTGATCTCAAACACTTCAAACTGAGGTTCACT
A_52_P326187	0.00843873	0.000212605	down	1.55517	-1.55517	-0.637069		predicted gene, 18752 [Source:MGI Symbol;Acc:MGI:5010937] [ENSMUST00000192876]	GATAAGCTTAGACTTGTCTGCTTTGAACTGAGCTCCAGTTTGGATATGTGGCAGCTGAGA
A_55_P2066440	0.0471938	0.00433221	down	1.55035	-1.55035	-0.632592	Myh3	Mus musculus myosin, heavy polypeptide 3, skeletal muscle, embryonic (Myh3), mRNA [NM_001099635]	CTGACAATTCTACTTAATTTCCACGTATCACTTTTCCACATGCAATAAAGTTTGCCTTGT
A_55_P2315057	0.0421047	0.00379953	down	1.5392	-1.5392	-0.622183	Ttll8	Mus musculus tubulin tyrosine ligase-like family, member 8 (Ttll8), mRNA [NM_172818]	ATCACTCTTAGATGCTCCACCCAAAGTGCGGAGTGCCCGGGCCCTGATGGAAACAGTGAT
A_66_P116004	0.0462658	0.00423305	down	1.53586	-1.53586	-0.619047	Olfr699	Mus musculus olfactory receptor 699 (Olfr699), mRNA [NM_001011862]	AAATGAAGGAAGGAAGAAAGCACCTTGTCACCTGTTTTTCTCACTTGACAGTAGTTGGTC
A_55_P2389714	0.00843873	0.000200432	down	1.53356	-1.53356	-0.616886	9430014N10Rik	Mus musculus RIKEN cDNA 9430014N10 gene (9430014N10Rik), long non-coding RNA [NR_045737]	TTAGTGATCTTTTCCGGCAAAAAGACTTGATCTTCACATTCTACAGGGAGTGGGTTTTTT
A_55_P2740622	0.0423939	0.00383055	down	1.52226	-1.52226	-0.606217	Rhbdd2	BC018360 rhomboid, veinlet-like 7 {Mus musculus} (exp=-1; wgp=0; cg=0), partial (15%) [TC1714084]	ATTAATTAACCCTCAGACTGCCTAGTGAGTGCTGGCACCATTCCTATTTTACAGGCTGGT
A_52_P572218	0.0139975	0.00104042	down	1.5208	-1.5208	-0.604832	Lin9	lin-9 homolog (C. elegans) [Source:MGI Symbol;Acc:MGI:1919818] [ENSMUST00000193162]	ATATCAGGTAAGTCATAGGTATGTGATGACGTGTAGGAATTCTGCTTATTTGTACAGTAT
A_55_P2717498	0.0138424	0.00102319	down	1.52073	-1.52073	-0.604764	Pard3b	par-3 family cell polarity regulator beta [Source:MGI Symbol;Acc:MGI:1919301] [ENSMUST00000129030]	GATAAGGATTTGCACTTTTCGTGTTGCCTGAAGAAGAATCACTCAATTTTCTTCTTTTTG
A_55_P2911533	0.0350989	0.00309803	down	1.51818	-1.51818	-0.602346	Dnajb4	DnaJ heat shock protein family (Hsp40) member B4 [Source:MGI Symbol;Acc:MGI:1914285] [ENSMUST00000196291]	CCCAGATCTAAAGGGAGCACTTTAGTTTTGCTCCTTCTTGTTTATGTTTCACTAACAACC
A_51_P276787	0.0462244	0.00422819	down	1.51541	-1.51541	-0.599705	1700018B24Rik	Mus musculus RIKEN cDNA 1700018B24 gene (1700018B24Rik), non-coding RNA [NR_003617]	CCATGGAAGACTGCCCCTAACCTGTGAATAATTTCTCTTCACATGAGCTTTGAGAATATT
A_51_P429770	0.0195727	0.00161939	down	1.51532	-1.51532	-0.599619	Fcer1a	Mus musculus Fc receptor, IgE, high affinity I, alpha polypeptide (Fcer1a), mRNA [NM_010184]	ATTGGCTGCTCCTTCAGACATCTGCTGACATGATCTTAGTCCATGGATCCTTTGACATCA
A_66_P105318	0.0138424	0.00102343	down	1.51174	-1.51174	-0.596215	Gm13383		AGTTGAATGGCCTAGAAGGGAGGCAGTTCTACCCATTGTAATACATGAATGGTTTCATTT
A_55_P2782833	0.031465	0.00274073	down	1.50521	-1.50521	-0.589965		UI-M-BH3-aur-g-10-0-UI.s1 NIH_BMAP_M_S4 Mus musculus cDNA clone UI-M-BH3-aur-g-10-0-UI 3'. [AW495160]	TATAGACAGAACATAAAGACCCACGTTAACACCCATTTGCAGGAAGGAAGGAAGAGGTGG
A_52_P616425	0.0459167	0.00419685	down	1.49479	-1.49479	-0.57994	Scn10a	Mus musculus sodium channel, voltage-gated, type X, alpha (Scn10a), transcript variant 2, mRNA [NM_009134]	CACCATTATTCAAAAGGCCTATCGGAACTACATGTTGCAACGCTCCTTGATGCTCTCCAA
A_55_P2728555	0.0118647	0.000820987	down	1.49278	-1.49278	-0.578001	Mlxipl		GGTAGAGGTAGTAGGATCATGGCTATCCTCTACTACACAGAGAAACCCTGTCTCAAAAAA
A_52_P537113	0.0240798	0.00204935	down	1.49176	-1.49176	-0.577017	Rad54l	RAD54 like (S. cerevisiae) [Source:MGI Symbol;Acc:MGI:894697] [ENSMUST00000139147]	CGAGGCAGTTTTCTGTATGAGAGGAAGAGGACATTCCACTTAGTTTTCTCTACTTCACTT
A_52_P272364	0.0287005	0.00247727	down	1.48859	-1.48859	-0.573947	Gria3	glutamate receptor, ionotropic, AMPA3 (alpha 3) [Source:MGI Symbol;Acc:MGI:95810] [ENSMUST00000128197]	TCCTGGTTTCTGTAAGTCAACTTTCAAAACTACATTTGTGATATTCCCTACTGTGATACA
A_55_P2740758	0.040087	0.00358672	down	1.48387	-1.48387	-0.569368	Ist1	increased sodium tolerance 1 homolog (yeast) [Source:MGI Symbol;Acc:MGI:1919205] [ENSMUST00000212170]	CCTGGAAGCTGAAAAGTGTCACAGTGTGGTTGATGACATTAATGGTGATAAAACTGTTTC
A_52_P574759	0.0427251	0.00386444	down	1.48333	-1.48333	-0.568835	Rbpjl	Mus musculus recombination signal binding protein for immunoglobulin kappa J region-like (Rbpjl), mRNA [NM_009036]	GAGCAGGAAGGAGAGAGATAGCTCACCTGACCTCAGGCCACTCACTGTCCTCAGACATAC
A_55_P2715041	0.0215333	0.00181411	down	1.47677	-1.47677	-0.562444	Wbp2	WW domain binding protein 2 [Source:MGI Symbol;Acc:MGI:104709] [ENSMUST00000129532]	TAGAGTAGCCCTTGCGACTCCTGTGCATGGTCAGAGTGATGAATGTCACAAACAGAATAT
A_55_P2386256	0.0179532	0.00145413	down	1.46874	-1.46874	-0.554576	D130062J10Rik	Q8K0H2_MOUSE (Q8K0H2) Chpt1 protein, partial (18%) [TC1616874]	CTATAGAGTTGGATCCCAGAAAGAACAGCCAGGGCTACAAGAAAAATCCTGTCTCGAAAA
A_55_P2228297	0.0138975	0.00103059	down	1.46466	-1.46466	-0.550562	D630002J18Rik		ATGTTAAATAGAGTAGGCCAGATTCAAAGAGAAAAATGTTGCCTGTTTTTCTTCTCCTGC
A_30_P01032988	0.0463019	0.00424173	down	1.45627	-1.45627	-0.542273		lincRNA:chr10:62347876-62374346 reverse strand	TAAAAAGAATCTCAGATGCTACAGTTTATGGCTTCCTGGGTTTTGATGTCTGTTTTAAAG
A_55_P2233462	0.0149946	0.00114222	down	1.45623	-1.45623	-0.54224	2700022O18Rik		AATTAGACTCCATTTCCACAACAAAAGGAGACAACCCTAACTTACAACCAGCCATTAAGC
A_55_P2136752	0.0378103	0.00336369	down	1.45532	-1.45532	-0.541341	Ermn	Mus musculus ermin, ERM-like protein (Ermn), mRNA [NM_029972]	TTGACATCTTGCATTCTAAGTGTGACGAGGAAGAAGAAGAAGAAGAAGAAGTTTGGAATG
A_52_P1139792	0.0316556	0.00275954	down	1.45226	-1.45226	-0.538303			GGTAGGTGTATTCAATCTGAATTTAGTTCTCAGTGTGTATTTGAATGGGCCTAGGTTGTT
A_55_P2730646	0.0177654	0.00143462	down	1.45106	-1.45106	-0.537108	Qrsl1	glutaminyl-tRNA synthase (glutamine-hydrolyzing)-like 1 [Source:MGI Symbol;Acc:MGI:1923813] [ENSMUST00000154405]	CATAGTGAGTTCTAGGCTAGCCTTGGATGTGAAATCCTATTAACATAAGAAAAGCAAAAT
A_51_P244020	0.0093621	0.000575885	down	1.44236	-1.44236	-0.528436	Rtbdn	Mus musculus retbindin (Rtbdn), mRNA [NM_144929]	TCCCACCTGTTTTCCTAGAAATGATCTAACCCTCACTTATTTTGCTTCCCCAAAATAAAG
A_55_P2717563	0.0447787	0.00407723	down	1.44007	-1.44007	-0.526141	Mia2	melanoma inhibitory activity 2 [Source:MGI Symbol;Acc:MGI:2159614] [ENSMUST00000175659]	AATCTCTGAGGCTGAGGCCAATCTGGTCTACATATCCAGTTCTAGTGCCACATAATGAGA
A_51_P204715	0.0472723	0.00434052	down	1.4396	-1.4396	-0.525666	Chpt1	choline phosphotransferase 1 [Source:MGI Symbol;Acc:MGI:2384841] [ENSMUST00000117440]	AAATGTTATTTAATAAAGTATGGACTTAATGTATAAGAACTTTTTAAGGTAAAATTCCTA
A_55_P2564840	0.0167259	0.00132403	down	1.43389	-1.43389	-0.519931	Gm15230	PREDICTED: Mus musculus predicted gene 15230 (Gm15230), transcript variant X2, ncRNA [XR_387114]	GGTGCTGGAATTAATGGCCTTTGCCTCCAGGACTAGATGGTGTTTTCTTATGGATTATCT
A_51_P394210	0.0421047	0.00379942	down	1.41653	-1.41653	-0.502356	Fap	Mus musculus fibroblast activation protein (Fap), mRNA [NM_007986]	TTCAGAACTCAGCACAGATTGCTAAAGCTTTGGTTAATGCACAAGTGGATTTCCAGGCGA
A_52_P385489	0.0406091	0.00364758	down	1.41543	-1.41543	-0.501241	Ppp1r3a	Mus musculus protein phosphatase 1, regulatory (inhibitor) subunit 3A (Ppp1r3a), mRNA [NM_080464]	AGTTAAAAGGGTTACTGTTATTCAATTGATTAACCATGGTTGCTTTTGTATTTTGGGGGG
A_55_P2638685	0.0255749	0.0021855	down	1.41542	-1.41542	-0.501226	Eif4g1	eukaryotic translation initiation factor 4, gamma 1 [Source:MGI Symbol;Acc:MGI:2384784] [ENSMUST00000129958]	GACCAGTAGATGACAGCAATGCAGAGGTGATAAACAGTAGCATCTTTCAGATACCATGTG
A_55_P1965015	0.0286619	0.00247127	down	1.39722	-1.39722	-0.48256	6530402F18Rik		TTCAGAAATCCTGATAAAATCTAATTTTCGGGTTTTAATACCCAGGCTATCAGACCCCCC
A_52_P381484	0.0178991	0.00144849	down	1.39612	-1.39612	-0.481421	Spon2	Mus musculus spondin 2, extracellular matrix protein (Spon2), mRNA [NM_133903]	CCACAGGAGGAACAAACGAAGAGGGGCAGTTTTTCGAAACTTGGCCCTTGTGTGTCGTTG
A_52_P298017	0.00843873	0.000272228	down	1.39571	-1.39571	-0.480996	Kansl1	Mus musculus KAT8 regulatory NSL complex subunit 1 (Kansl1), mRNA [NM_001081045]	GTTGCTGCAACAACTCGTGTTGAGAAACTACAATACAAAGAAATCCTTACTCCAAGCTGG
A_66_P128870	0.0402259	0.00360382	down	1.38919	-1.38919	-0.474246	9330175E14Rik	BB241216 RIKEN full-length enriched, 3 days neonate thymus Mus musculus cDNA clone A630085K21 3'. [BB241216]	TCACCCCCATGCAAAGGTTAAACACCTTGTGTCTCCCCTAATAAATTGAACCAGTTCTCT
A_55_P2935276	0.021957	0.00185491	down	1.38849	-1.38849	-0.473518	Cdv3	carnitine deficiency-associated gene expressed in ventricle 3 [Source:MGI Symbol;Acc:MGI:2448759] [ENSMUST00000190127]	TGGGTTAGAGTGAGTTTAAGGTTACTCTGAGCAATTTAGTGAGACCCTATCTCAAAACTT
A_55_P2732483	0.0247801	0.00211298	down	1.38807	-1.38807	-0.47308	Cc2d2a	Mus musculus coiled-coil and C2 domain containing 2A (Cc2d2a), mRNA [NM_172274]	TAAAAAGCTTCCTGAGAACATACAGCCAAGATTCCTGGAAGATGAAGGTCTTTACATCGG
A_55_P2045745	0.0182155	0.00148171	down	1.38392	-1.38392	-0.468762	Spag6	Mus musculus sperm associated antigen 6 (Spag6), mRNA [NM_001001334]	TGACTTCGTGAAGAAGAATGCTTGTACTCTGATTAGAGAGATCGCAAAACATACACCAGA
A_52_P150988	0.0406791	0.00365576	down	1.37885	-1.37885	-0.463461	Txndc11	Mus musculus thioredoxin domain containing 11 (Txndc11), transcript variant 1, mRNA [NM_029582]	AAACAGAAGCATTTCTTCTATTTTCCTGTGATACATCTGTATCATCGGAGTTTTGGACCA
A_52_P176608	0.0198294	0.00164512	down	1.37668	-1.37668	-0.461191		GB	CTGGCAGCTTTGAGGATGGATTCTAGTCATGTCCACAGAGAAAGCATTGCTGCAGTGGTG
A_51_P115953	0.0121553	0.000851536	down	1.36505	-1.36505	-0.448953	Ctxn3	Mus musculus cortexin 3 (Ctxn3), mRNA [NM_001134697]	TGTTGTTGAAGATATTGTAAAACCAAGCGCACCAACAAGCGCACCAACACTTGCGAAGAT
A_55_P2900363	0.01735	0.00138713	down	1.35963	-1.35963	-0.443217	Hlf	Mus musculus hepatic leukemia factor (Hlf), mRNA [NM_172563]	TAATCCTAGTGTACGCTAGAGCATGCTGCCTGAGTATTAACTAGTGGACGTAGGAAAAAA
A_65_P20683	0.0495485	0.00458174	down	1.35766	-1.35766	-0.441118	Gm1070	PREDICTED: Mus musculus predicted gene 1070 (Gm1070), misc_RNA [XR_105056]	CCTGCTCGGTGCTCTGGATCTGACAGTTGTAGCATTTGAATCTCAAGTATACAAAGTGCA
A_55_P2835357	0.0185575	0.00151427	down	1.35684	-1.35684	-0.440255	Gm36356	PREDICTED: Mus musculus predicted gene, 36356 (Gm36356), transcript variant X2, ncRNA [XR_870018]	CGTGGGTTCAAGCCTCAGTACTGAAAACTAAAAAATTAGAATAAATATGTTCACGATGTG
A_55_P2714409	0.0427461	0.00386932	down	1.33973	-1.33973	-0.421944	BC004004	cDNA sequence BC004004 [Source:MGI Symbol;Acc:MGI:2136782] [ENSMUST00000156215]	ACTAAGGGATTAGTAAGGCTTAGTTTCCAGATCTCAGCCCAGCTATGAAATACTTGGATT
A_52_P631240	0.0147466	0.00111768	down	1.33814	-1.33814	-0.420229	Frmd4a	FERM domain containing 4A [Source:MGI Symbol;Acc:MGI:1919850] [ENSMUST00000142452]	GAGAGTGAGATCACATTACATTTCAACTTGGCTTAATTATGTCTGGATTGATTTAAACCG
A_55_P2734597	0.0174391	0.00139953	down	1.3353	-1.3353	-0.417168	Ccdc88c	Mus musculus coiled-coil domain containing 88C (Ccdc88c), mRNA [NM_026681]	GACGGTCACGGTGACGGAAAAGGCAAAACCGAATCAGCCTTGAAAACAACACTGGCTATG
A_30_P01020543	0.0234198	0.00198937	down	1.33461	-1.33461	-0.416413		lincRNA:chr5:35893909-35899497 reverse strand	CTCCTTCTGGTGGGGCTTGAGCAGCAAAGACTTAGGCACGATCTTGCCTGCTAACACCTC
A_55_P2722550	0.0407884	0.00366748	down	1.33403	-1.33403	-0.415786		predicted pseudogene 6743 [Source:MGI Symbol;Acc:MGI:3648616] [ENSMUST00000117345]	CAAAGGAAGAGTTAATACAGAGTACATCATCAGAAAGGCTCTCATGGGACGTTTGGATGA
A_66_P134536	0.0233035	0.00197733	down	1.32751	-1.32751	-0.408721	Gm11419	PREDICTED: Mus musculus predicted gene 11419 (Gm11419), transcript variant X14, ncRNA [XR_001780113]	TACATGGGGAAGTAGCCCTATGGACCATCTAGAGAGCAATAGGGCTCCAAGAAATAAAGA
A_51_P380005	0.0188961	0.00155156	down	1.31754	-1.31754	-0.397851	Galnt3	Mus musculus UDP-N-acetyl-alpha-D-galactosamine:polypeptide N-acetylgalactosaminyltransferase 3 (Galnt3), mRNA [NM_015736]	GTTGTCTCTTGTTGACTTGTCTGTCAAATATTTCCTTAAACATGAAGTTGATAAGGAGAG
A_52_P260407	0.017585	0.00141493	down	1.31129	-1.31129	-0.390984	Dennd4c	Mus musculus DENN/MADD domain containing 4C (Dennd4c), mRNA [NM_184088]	GCTTTTAAAATACTAATGAATAAATAGTCTTTGACCCCGAAATCTTTATTCAGGCAGGCC
A_52_P1061767	0.049032	0.00452373	down	1.29333	-1.29333	-0.371091			AGCTGTGCCACCTCCTAAATAAAACAAACAAAACCCTTCTCTTATTGATGACTTATACCA
A_65_P04040	0.0348112	0.00306931	down	1.29125	-1.29125	-0.368763	Spag5	Mus musculus sperm associated antigen 5 (Spag5), mRNA [NM_017407]	AGAGTCTCACCCTCTTCTTACAGGCAAAACTCAAGGAGAACAAGGCTGAATCAGAGATCA
A_65_P08754	0.0404375	0.00362653	down	1.27941	-1.27941	-0.355476	2810427A07Rik	BY472304 RIKEN full-length enriched, melanocyte Mus musculus cDNA clone G270118C06 3', mRNA sequence [BY472304]	ATTCACTTTGAAGTTGGATAGGAATTTAGGATCTTTAGTAAGAAGTGTAGAACATTCCCC
A_55_P2715949	0.0188692	0.0015476	down	1.27535	-1.27535	-0.350892	A630001G21Rik	RIKEN cDNA A630001G21 gene [Source:MGI Symbol;Acc:MGI:2443131] [ENSMUST00000159325]	GCATTCAAACACATAAGTCTATGGAGACTATTCCTATTCAAACCACCACAGCATCTAGCA
A_55_P2857230	0.0234063	0.00198714	down	1.27391	-1.27391	-0.349265	Bzw1	Mus musculus basic leucine zipper and W2 domains 1 (Bzw1), mRNA [NM_025824]	TGATGCTTCTGGAGCAAAACTTGACTACCGCCGCTATGCAGAAACACTCTTTGACATTCT
A_55_P2727903	0.0301459	0.00261463	down	1.27157	-1.27157	-0.346607	4930568A12Rik	PREDICTED: Mus musculus RIKEN cDNA 4930568A12 gene (4930568A12Rik), transcript variant X2, misc_RNA [XR_373301]	ATTCTGAAAGAAGTTCTGCAAAACACAAATGTGTGTCCCACCTCAGCTCCAAGCAACACC
A_52_P624107	0.0491275	0.00453368	down	1.2659	-1.2659	-0.340165	Gm5039	Mus musculus predicted gene 5039 (Gm5039), non-coding RNA [NR_003647]	TGGTTGGTCTACAAGACTATCAAGATAACAAAGCTGATGTACTCTTAAAGTATAATCCAG
A_66_P121873	0.0380159	0.0033864	down	1.25459	-1.25459	-0.327221	Cep131	Mus musculus centrosomal protein 131 (Cep131), mRNA [NM_009734]	ACAAGAAAGTTCTGAGCGAGAAGTGTGAGGCAGTGGTGGCCGAGCTGAAGCACGGGGACC
A_30_P01021911	0.0427461	0.00386929	down	1.25334	-1.25334	-0.325775		lincRNA:chr4:82156098-82196298 forward strand	TACCCGGCCCAGAGCCACTGGCTGTGGTTCCTTGCGGTTTCCCTCCACGTGGCCGGCGCT
A_55_P2713360	0.0248506	0.00211957	down	1.25241	-1.25241	-0.32471	Snd1	staphylococcal nuclease and tudor domain containing 1 [Source:MGI Symbol;Acc:MGI:1929266] [ENSMUST00000183161]	TTTTATTAGTAAGAAGAAGTAGAGCTGAAACTTGAACCCAGGGCTGCCTGCCACCACACA
A_55_P2417569	0.0242548	0.00206586	down	1.24834	-1.24834	-0.320014	Prrx2	Mus musculus paired related homeobox 2 (Prrx2), mRNA [NM_009116]	GGCGGAGCTGGAGTCCGCCAAGGAACTCACTTACTTATGTATTAAAACCAAAAAGCTTTT
A_55_P2717265	0.0379525	0.00337811	down	1.24176	-1.24176	-0.312385	Arid4b	Mus musculus AT rich interactive domain 4B (RBP1-like) (Arid4b), transcript variant 2, mRNA [NM_198122]	ATTTGACAGTGGGCACTGATGTGAGTGCCAAATACAGAGGAGCCTTCTGTGAAGCCAAGA
A_55_P2737174	0.0401762	0.0035975	down	1.23115	-1.23115	-0.300005	Ccdc136	Mus musculus coiled-coil domain containing 136 (Ccdc136), transcript variant 4, mRNA [NM_001347072]	AGAACTTCCACAGGAGTTACGAGAGCTCCATTGATGAAAATGAGGGCTATCAGAAGAGTT
